# Supplementary material for: Risk of stroke in relation to degree of asymptomatic carotid stenosis: a population-based cohort study, systematic review, and meta-analysis
Source: PubMed Central journal article supplement (PMC7889579; doi:10.1016/s1474-4422(20)30484-1), 2021-03

# THE LANCET Neurology

## Supplementary appendix

This appendix formed part of the original submission and has been peer reviewed.  
We post it as supplied by the authors.

Supplement to: Howard DPJ, Gaziano L, Rothwell PM, on behalf of the Oxford Vascular Study, et al. Risk of stroke in relation to degree of asymptomatic carotid stenosis: a population-based cohort study, systematic review, and meta-analysis. *Lancet Neurol* 2021; **20**: 193–202.

## Supplementary Material

### Supplementary Appendix 1. Reporting checklist for meta-analysis of observational studies.

Based on the MOOSE guidelines.

|                   | Reporting Item                                                                                                                                                                                                                                                                                                                                        | Page Number          |
|-------------------|-------------------------------------------------------------------------------------------------------------------------------------------------------------------------------------------------------------------------------------------------------------------------------------------------------------------------------------------------------|----------------------|
| <b>Title</b>      |                                                                                                                                                                                                                                                                                                                                                       |                      |
|                   | <a href="#">#1</a> Identify the study as a meta-analysis of observational research                                                                                                                                                                                                                                                                    | 1                    |
| <b>Abstract</b>   |                                                                                                                                                                                                                                                                                                                                                       |                      |
|                   | <a href="#">#2</a> Provide a structured summary including, as applicable: background; objectives; data sources; study eligibility criteria, participants, and interventions; study appraisal and synthesis methods; results; limitations; conclusions and implications of key findings; systematic review registration number (From PRISMA checklist) | 3                    |
| <b>Background</b> |                                                                                                                                                                                                                                                                                                                                                       |                      |
|                   | <a href="#">#3a</a> Problem definition                                                                                                                                                                                                                                                                                                                | 2                    |
|                   | <a href="#">#3b</a> Hypothesis statement                                                                                                                                                                                                                                                                                                              | 5                    |
|                   | <a href="#">#3c</a> Description of study outcomes                                                                                                                                                                                                                                                                                                     | 2                    |
|                   | <a href="#">#3d</a> Type of exposure or intervention used                                                                                                                                                                                                                                                                                             | 5                    |
|                   | <a href="#">#3e</a> Type of study designs used                                                                                                                                                                                                                                                                                                        | 5                    |
|                   | <a href="#">#3f</a> Study population                                                                                                                                                                                                                                                                                                                  | 5                    |
| <b>Methods</b>    |                                                                                                                                                                                                                                                                                                                                                       |                      |
| Search strategy   | <a href="#">#4a</a> Qualifications of searchers (eg, librarians and investigators)                                                                                                                                                                                                                                                                    | 7-8                  |
| Search strategy   | <a href="#">#4b</a> Search strategy, including time period included in the synthesis and keywords                                                                                                                                                                                                                                                     | 7                    |
| Search strategy   | <a href="#">#4c</a> Effort to include all available studies, including contact with authors                                                                                                                                                                                                                                                           | 7, Appendix Figure 3 |
| Search strategy   | <a href="#">#4d</a> Databases and registries searched                                                                                                                                                                                                                                                                                                 | 7                    |

|                 |                     |                                                                                                                                                                                                                                                                              |                                  |
|-----------------|---------------------|------------------------------------------------------------------------------------------------------------------------------------------------------------------------------------------------------------------------------------------------------------------------------|----------------------------------|
| Search strategy | <a href="#">#4e</a> | Search software used, name and version, including special features used (eg, explosion)                                                                                                                                                                                      | 7, Appendix 2                    |
| Search strategy | <a href="#">#4f</a> | Use of hand searching (eg, reference lists of obtained articles)                                                                                                                                                                                                             | 7-8, Appendix 4                  |
| Search strategy | <a href="#">#4g</a> | List of citations located and those excluded, including justification                                                                                                                                                                                                        | 7-8, Appendix Figure 3           |
| Search strategy | <a href="#">#4h</a> | Method of addressing articles published in languages other than English                                                                                                                                                                                                      | 7-8                              |
| Search strategy | <a href="#">#4i</a> | Method of handling abstracts and unpublished studies                                                                                                                                                                                                                         | 7-8                              |
| Search strategy | <a href="#">#4j</a> | Description of any contact with authors                                                                                                                                                                                                                                      | 7-8                              |
|                 | <a href="#">#5a</a> | Description of relevance or appropriateness of studies gathered for assessing the hypothesis to be tested                                                                                                                                                                    | Appendix Table 1                 |
|                 | <a href="#">#5b</a> | Rationale for the selection and coding of data (eg, sound clinical principles or convenience)                                                                                                                                                                                | 7-9                              |
|                 | <a href="#">#5c</a> | Documentation of how data were classified and coded (eg, multiple raters, blinding, and interrater reliability)                                                                                                                                                              | 7-9                              |
|                 | <a href="#">#5d</a> | Assessment of confounding (eg, comparability of cases and controls in studies where appropriate)                                                                                                                                                                             | 7-9                              |
|                 | <a href="#">#5e</a> | Assessment of study quality, including blinding of quality assessors; stratification or regression on possible predictors of study results                                                                                                                                   | 7-9, Appendix Table 1            |
|                 | <a href="#">#5f</a> | Assessment of heterogeneity                                                                                                                                                                                                                                                  | 9, 11                            |
|                 | <a href="#">#5g</a> | Description of statistical methods (eg, complete description of fixed or random effects models, justification of whether the chosen models account for predictors of study results, dose-response models, or cumulative meta-analysis) in sufficient detail to be replicated | 8-9                              |
|                 | <a href="#">#5h</a> | Provision of appropriate tables and graphics                                                                                                                                                                                                                                 | Appendix Table 1, Figure 2       |
| <b>Results</b>  |                     |                                                                                                                                                                                                                                                                              |                                  |
|                 | <a href="#">#6a</a> | Graphic summarizing individual study estimates and overall estimate                                                                                                                                                                                                          | Figures 4, Appendix Figures 3    |
|                 | <a href="#">#6b</a> | Table giving descriptive information for each study included                                                                                                                                                                                                                 | Appendix Table 1                 |
|                 | <a href="#">#6c</a> | Results of sensitivity testing (eg, subgroup analysis)                                                                                                                                                                                                                       | Figure 2-3, Appendix Figures 4-8 |
|                 | <a href="#">#6d</a> | Indication of statistical uncertainty of findings                                                                                                                                                                                                                            | 10-11                            |

## Discussion

|                     |                                                                               |                          |
|---------------------|-------------------------------------------------------------------------------|--------------------------|
| <a href="#">#7a</a> | Quantitative assessment of bias (eg. publication bias)                        | 10-12, Appendix Figure 9 |
| <a href="#">#7b</a> | Justification for exclusion (eg, exclusion of non–English-language citations) | 8-9, 10-13               |
| <a href="#">#7c</a> | Assessment of quality of included studies                                     | 12-13, Appendix Table 1  |

## Conclusion

|                     |                                                                                                                           |       |
|---------------------|---------------------------------------------------------------------------------------------------------------------------|-------|
| <a href="#">#8a</a> | Consideration of alternative explanations for observed results                                                            | 12-13 |
| <a href="#">#8b</a> | Generalization of the conclusions (ie, appropriate for the data presented and within the domain of the literature review) | 12-13 |
| <a href="#">#8c</a> | Guidelines for future research                                                                                            | 12-13 |
| <a href="#">#8d</a> | Disclosure of funding source                                                                                              | 14    |

## Supplementary Appendix 2

PUBMED/MEDLINE(R) 1946 TO PRESENT - ACCESSED 1<sup>st</sup> OCTOBER 2020  
EMBASE (OVID) 1974 TO PRESENT- ACCESSED 1<sup>st</sup> OCTOBER 2020

1. exp Carotid Stenosis/
2. Plaque, Atherosclerotic/
3. (carotid adj3 (stenos\$ or athero\$ or narrow\$ or constrict\$ or obstruct\$ or ulcer\$ or plaque\$ or occlus\$ or bruit\$)).tw.
4. exp Stroke/
5. Stroke\$.tw.
6. cerebrovascular.tw.
7. ((brain or vascular or lacunar or venous or cerebral or isch?emic) adj2 (accident\$ or infarct\$ or event\$ or attack\$)).tw.
8. (cva or cvas).tw.
9. or/4-8

THE COCHRANE LIBRARY WILEY - ACCESSED 1<sup>st</sup> OCTOBER 2020

- #1 MeSH descriptor: [Carotid Stenosis] explode all trees
- #2 MeSH descriptor: [Plaque, Atherosclerotic] explode all trees
- #3 (carotid near/3 (athero\* or stenos\* or ulcer\* or plaque\* or narrow\* or obstruct\* or occlus\* or constrict\* or bruit\*))
- #4 #1 or #2 or #3
- #5 MeSH descriptor: [Stroke] explode all trees
- #6 Stroke\*
- #7 cerebrovascular
- #8 cva or cvas
- #9 #4 or #5 or #6 or #7 or #8

**Supplementary Appendix 3. STROBE Statement—Checklist of items that should be included in reports of *cohort studies***

| Section/Topic                | Item # | Recommendation                                                                                                                                                                       | Reported on page #         |
|------------------------------|--------|--------------------------------------------------------------------------------------------------------------------------------------------------------------------------------------|----------------------------|
| Title and abstract           | 1      | (a) Indicate the study's design with a commonly used term in the title or the abstract                                                                                               | 2                          |
|                              |        | (b) Provide in the abstract an informative and balanced summary of what was done and what was found                                                                                  | 2                          |
| <b>Introduction</b>          |        |                                                                                                                                                                                      |                            |
| Background/rationale         | 2      | Explain the scientific background and rationale for the investigation being reported                                                                                                 | 3-4                        |
| Objectives                   | 3      | State specific objectives, including any prespecified hypotheses                                                                                                                     | 3-4                        |
| <b>Methods</b>               |        |                                                                                                                                                                                      |                            |
| Study design                 | 4      | Present key elements of study design early in the paper                                                                                                                              | 5                          |
| Setting                      | 5      | Describe the setting, locations, and relevant dates, including periods of recruitment, exposure, follow-up, and data collection                                                      | 5                          |
| Participants                 | 6      | (a) Give the eligibility criteria, and the sources and methods of selection of participants. Describe methods of follow-up                                                           | 5-7                        |
|                              |        | (b) For matched studies, give matching criteria and number of exposed and unexposed                                                                                                  | N/A                        |
| Variables                    | 7      | Clearly define all outcomes, exposures, predictors, potential confounders, and effect modifiers. Give diagnostic criteria, if applicable                                             | 5-6                        |
| Data sources/<br>measurement | 8*     | For each variable of interest, give sources of data and details of methods of assessment (measurement). Describe comparability of assessment methods if there is more than one group | 5-8                        |
| Bias                         | 9      | Describe any efforts to address potential sources of bias                                                                                                                            | 5-8                        |
| Study size                   | 10     | Explain how the study size was arrived at                                                                                                                                            | 5-6                        |
| Quantitative variables       | 11     | Explain how quantitative variables were handled in the analyses. If applicable, describe which groupings were chosen and why                                                         | 6-7                        |
| Statistical methods          | 12     | (a) Describe all statistical methods, including those used to control for confounding                                                                                                | 7-9                        |
|                              |        | (b) Describe any methods used to examine subgroups and interactions                                                                                                                  | 7-9                        |
|                              |        | (c) Explain how missing data were addressed                                                                                                                                          | 7-9                        |
|                              |        | (d) If applicable, explain how loss to follow-up was addressed                                                                                                                       | 7-9                        |
|                              |        | (e) Describe any sensitivity analyses                                                                                                                                                | 7-9 (Appendix Figures 4-8) |
| <b>Results</b>               |        |                                                                                                                                                                                      |                            |

|                          |     |                                                                                                                                                                                                              |       |
|--------------------------|-----|--------------------------------------------------------------------------------------------------------------------------------------------------------------------------------------------------------------|-------|
| Participants             | 13* | (a) Report numbers of individuals at each stage of study—eg numbers potentially eligible, examined for eligibility, confirmed eligible, included in the study, completing follow-up, and analysed            | 8-9   |
|                          |     | (b) Give reasons for non-participation at each stage                                                                                                                                                         | 8-9   |
|                          |     | (c) Consider use of a flow diagram                                                                                                                                                                           | N/A   |
| Descriptive data         | 14* | (a) Give characteristics of study participants (eg demographic, clinical, social) and information on exposures and potential confounders                                                                     | 8-10  |
|                          |     | (b) Indicate number of participants with missing data for each variable of interest                                                                                                                          | 8-10  |
|                          |     | (c) Summarise follow-up time (eg, average and total amount)                                                                                                                                                  | 8-11  |
| Outcome data             | 15* | Report numbers of outcome events or summary measures over time                                                                                                                                               | 8-11  |
| Main results             | 16  | (a) Give unadjusted estimates and, if applicable, confounder-adjusted estimates and their precision (eg, 95% confidence interval). Make clear which confounders were adjusted for and why they were included | 10-11 |
|                          |     | (b) Report category boundaries when continuous variables were categorized                                                                                                                                    | 10-11 |
|                          |     | (c) If relevant, consider translating estimates of relative risk into absolute risk for a meaningful time period                                                                                             | 10-11 |
| Other analyses           | 17  | Report other analyses done—eg analyses of subgroups and interactions, and sensitivity analyses                                                                                                               | 10-11 |
| <b>Discussion</b>        |     |                                                                                                                                                                                                              |       |
| Key results              | 18  | Summarise key results with reference to study objectives                                                                                                                                                     | 12-13 |
| <b>Limitations</b>       |     |                                                                                                                                                                                                              |       |
| Interpretation           | 20  | Give a cautious overall interpretation of results considering objectives, limitations, multiplicity of analyses, results from similar studies, and other relevant evidence                                   | 13    |
| Generalisability         | 21  | Discuss the generalisability (external validity) of the study results                                                                                                                                        | 13    |
| <b>Other information</b> |     |                                                                                                                                                                                                              |       |
| Funding                  | 22  | Give the source of funding and the role of the funders for the present study and, if applicable, for the original study on which the present article is based                                                | 8,14  |

\*Give information separately for cases and controls in case-control studies and, if applicable, for exposed and unexposed groups in cohort and cross-sectional studies.

**Supplementary figure 1.** Risk of recurrent vascular events by degree of asymptomatic ipsilateral carotid stenosis in 207 patients with asymptomatic carotid stenosis in the Oxford Vascular Study.

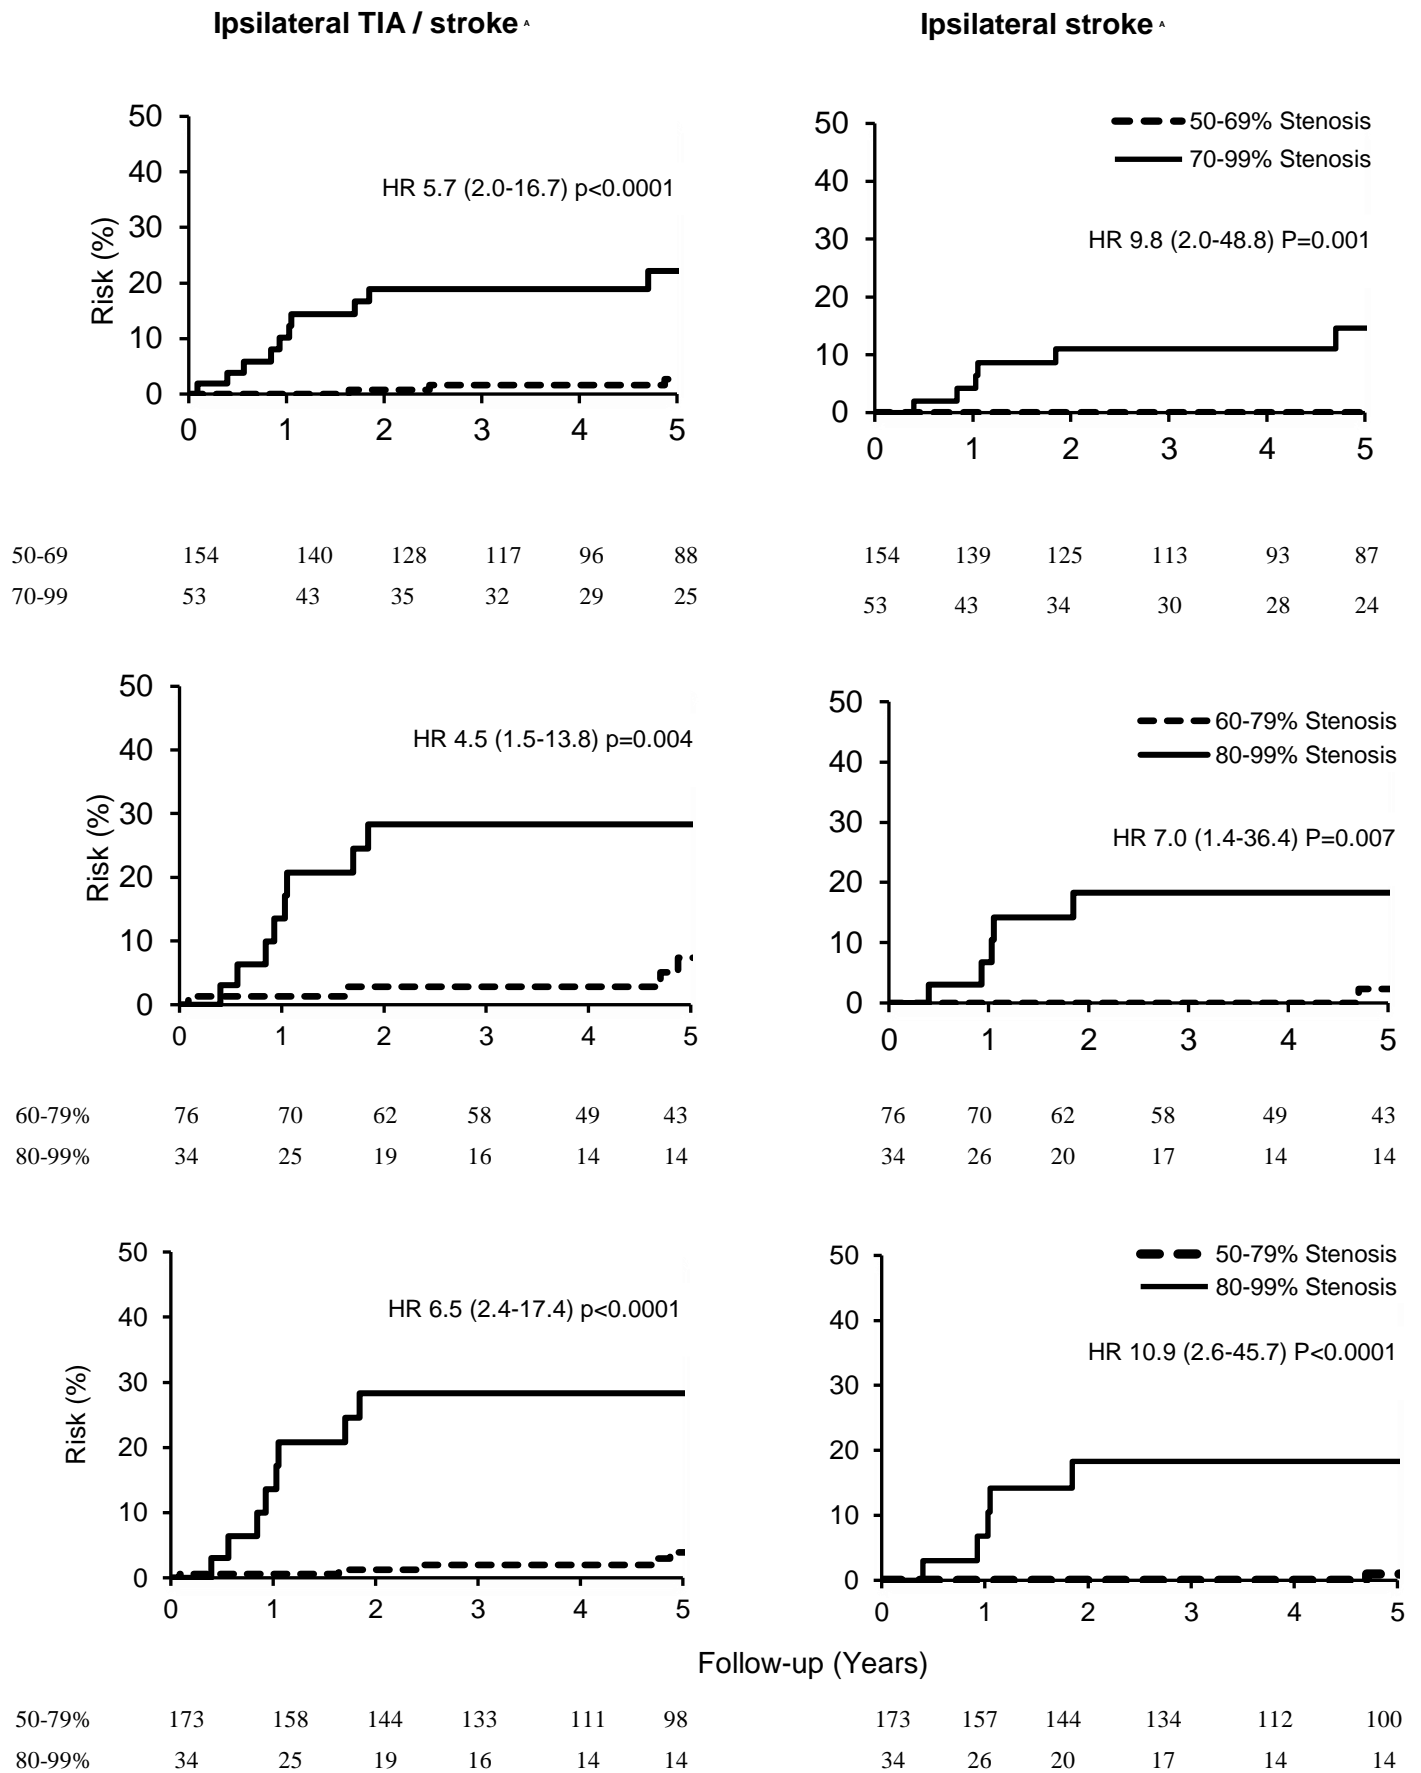

The exact range and cut-points used to report the stenosis/risk data in trials and previous studies varies with some defining severe stenosis as 70-99% and some as 80-99%. We therefore analysed various cut-points in The Oxford Vascular Study.



**Supplementary Figure 2.** Risk of events by degree of asymptomatic ipsilateral carotid stenosis excluding patients with baseline AF (n=51 excluded)

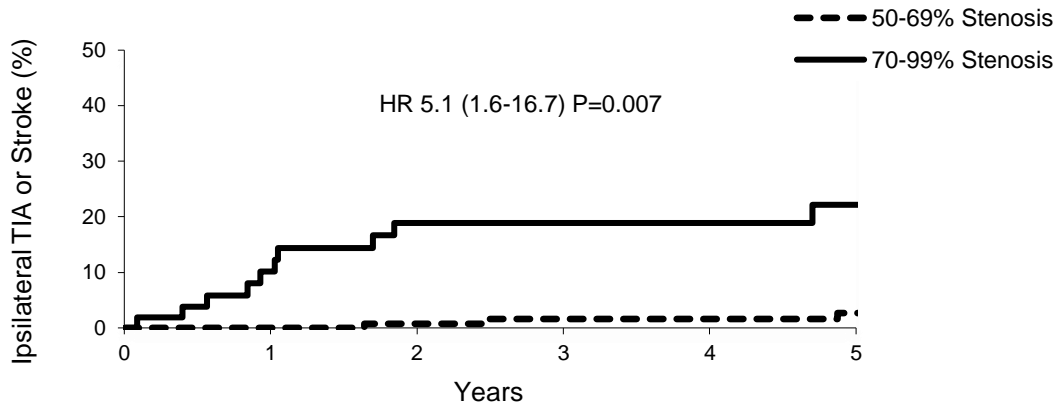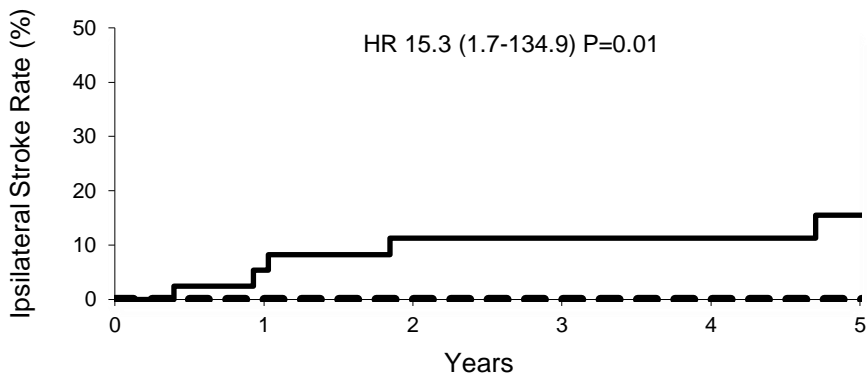

Numbers At Risk

|        |     |     |    |    |    |    |
|--------|-----|-----|----|----|----|----|
| 50-69% | 114 | 106 | 98 | 91 | 79 | 72 |
| 70-99% | 42  | 34  | 29 | 27 | 23 | 21 |

Supplementary Figure 3. PRISMA diagram for Systematic Review and Meta-analysis

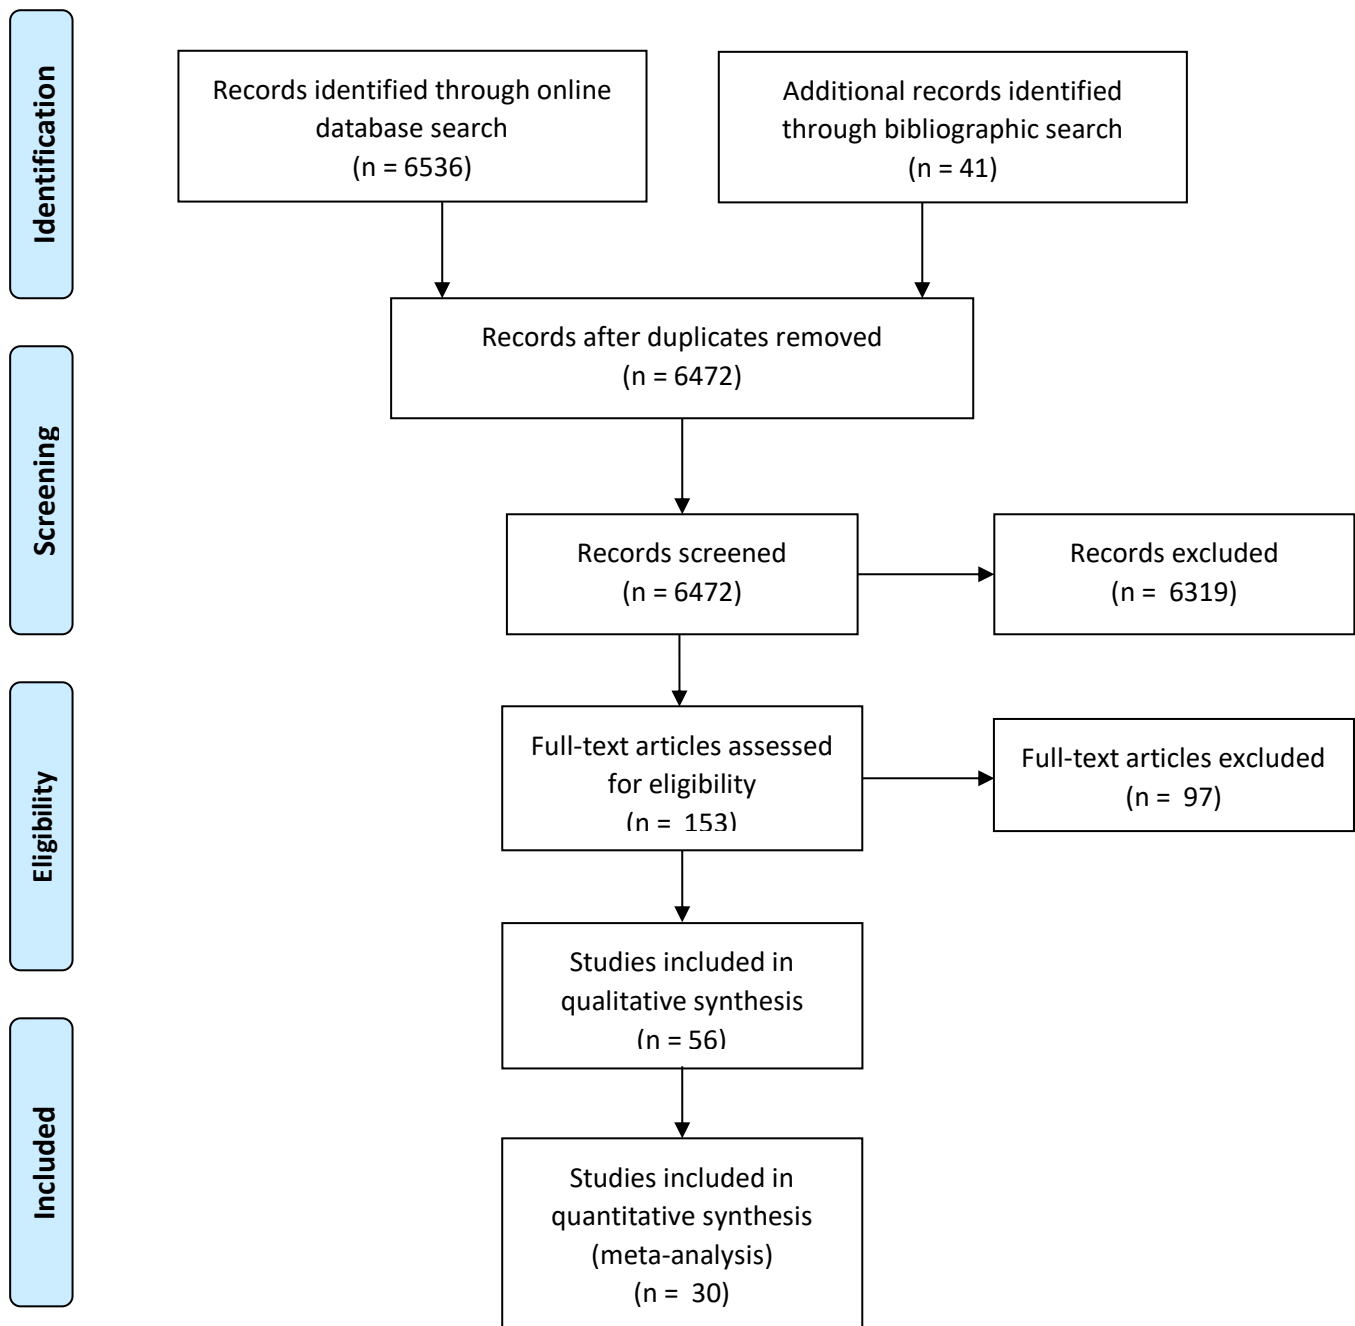

## Supplementary Appendix 4

### Systematic Review Reference List

1. Halliday A, Mansfield A, Marro J, et al. Prevention of disabling and fatal strokes by successful carotid endarterectomy in patients without recent neurological symptoms: randomised controlled trial. *Lancet* 2004;363:1491-502.
2. Endarterectomy for asymptomatic carotid artery stenosis. Executive Committee for the Asymptomatic Carotid Atherosclerosis Study. *JAMA* 1995;273:1421-8.
3. Halliday A, Harrison M, Hayter E, Kong X, Mansfield A, Marro J, et al. 10-year stroke prevention after successful carotid endarterectomy for asymptomatic stenosis (ACST-1): a multicentre randomised trial. *Lancet* 2010;376:1074-84
4. Norris JW, Zhu CZ, Bornstein NM, Chambers BR. Vascular risks of asymptomatic carotid stenosis. *Stroke* 1991;22:1485-90.
5. Mackey AE, Abrahamowicz M, Langlois Y, et al. Outcome of asymptomatic patients with carotid disease. Asymptomatic Cervical Bruit Study Group. *Neurology* 1997;48:896-903.
6. Longstreth WT, Jr., Shemanski L, Lefkowitz D, O'Leary DH, Polak JF, Wolfson SK, Jr. Asymptomatic internal carotid artery stenosis defined by ultrasound and the risk of subsequent stroke in the elderly. The Cardiovascular Health Study. *Stroke* 1998;29:2371-6.
7. Abbott AL, Chambers BR, Stork JL, Levi CR, Bladin CF, Donnan GA. Embolic signals and prediction of ipsilateral stroke or transient ischemic attack in asymptomatic carotid stenosis: a multicenter prospective cohort study. *Stroke* 2005;36:1128-33.
8. Goessens BM, Visseren FL, Kappelle LJ, Algra A, van der Graaf Y. Asymptomatic carotid artery stenosis and the risk of new vascular events in patients with manifest arterial disease: the SMART study. *Stroke* 2007;38:1470-5.
9. Dick P, Sherif C, Sabeti S, Amighi J, Minar E, Schillinger M. Gender differences in outcome of conservatively treated patients with asymptomatic high grade carotid stenosis. *Stroke* 2005;36:1178-83.
10. Nicolaidis AN, Kakkos SK, Kyriacou E, et al. Asymptomatic internal carotid artery stenosis and cerebrovascular risk stratification. *J Vasc Surg* 2010;52:1486-96 e1-5.
11. Markus HS, King A, Shipley M, et al. Asymptomatic embolisation for prediction of stroke in the Asymptomatic Carotid Emboli Study (ACES): a prospective observational study. *Lancet Neurol* 2010;9:663-71.
12. Madani A, Beletsky V, Tamayo A, Munoz C, Spence JD. High-risk asymptomatic carotid stenosis: ulceration on 3D ultrasound vs TCD microemboli. *Neurology* 2011;77:744-50.
13. Silvestrini M, Cagnetti C, Pasqualetti P, et al. Carotid wall thickness and stroke risk in patients with asymptomatic internal carotid stenosis. *Atherosclerosis* 2010;210:452-7.
14. Durham CA, Ehlert BA, Agle SC, et al. Role of statin therapy and angiotensin blockade in patients with asymptomatic moderate carotid artery stenosis. *Ann Vasc Surg* 2012;26:344-52.
15. Silvestrini M, Altamura C, Cerqua R, Pasqualetti P, Viticchi G, Provinciali L, Paulon L and Vernieri F. Ultrasonographic markers of vascular risk in patients with asymptomatic carotid stenosis. *Journal of cerebral blood flow and metabolism : official journal of the International Society of Cerebral Blood Flow and Metabolism.* 2013;33:619-24.

16. Sabeti S, Schlager O, Exner M, et al. Progression of carotid stenosis detected by duplex ultrasonography predicts adverse outcomes in cardiovascular high-risk patients. *Stroke*. Nov 2007;38(11):2887-2894.
17. Conrad MF, Boulom V, Mukhopadhyay S, Garg A, Patel VI and Cambria RP. Progression of asymptomatic carotid stenosis despite optimal medical therapy. *Journal of vascular surgery*. 2013;58:128-35 e1
18. Hicks CW, Talbott K, Canner JK, Qazi U, Arhuidese I, Glebova NO, Freischlag JA, Perler BA and Malas MB. Risk of disease progression in patients with moderate asymptomatic carotid artery stenosis: implications of tobacco use and dual antiplatelet therapy. *Annals of vascular surgery*. 2015;29:1-8
19. Wang D, Wang J, Jin C, Ji R, Wang A, Li X, Gao X, Wu S, Zhou Y and Zhao X. Asymptomatic Extracranial Artery Stenosis and the Risk of Cardiovascular and Cerebrovascular Diseases. *Scientific reports*. 2016;6:33960
20. Hobson RW, 2nd, Weiss DG, Fields WS, et al. Efficacy of carotid endarterectomy for asymptomatic carotid stenosis. The Veterans Affairs Cooperative Study Group. *N Engl J Med* 1993;328:221-7.
21. Inzitari D, Eliasziw M, Gates P, et al. The causes and risk of stroke in patients with asymptomatic internal-carotid-artery stenosis. North American Symptomatic Carotid Endarterectomy Trial Collaborators. *N Engl J Med* 2000;342:1693-700.
22. AbuRahma, A. F., Cook, C. C., Metz, M. J., Wulu, J. T. & Bartolucci, A. Natural history of carotid artery stenosis contralateral to endarterectomy: results from two randomized prospective trials. *J. Vasc. Surg.* **38**, 1154–1160 (2003)
23. Autret, A., Saudeau, D., Bertrand, P. & Pourcelot, L. Stroke risk in patients with carotid stenosis. *Lancet* (1987).
24. Ballotta, E. *et al.* Progression of atherosclerosis in asymptomatic carotid arteries after contralateral endarterectomy: A 10-year prospective study. *J. Vasc. Surg.* **45**, 516–522 (2007).
25. Ballotta, E. *et al.* Carotid endarterectomy for asymptomatic carotid stenosis in the very elderly. *J. Vasc. Surg.* **61**, 382–388 (2015).
26. Bock, R. W. *et al.* The natural history of asymptomatic carotid artery disease. *J. Vasc. Surg.* **17**, 160-9–1 (1993).
27. Bogousslavsky, J., Despland, P. A. & Regli, F. Asymptomatic tight stenosis of the internal carotid artery: long-term prognosis. *Neurology* **36**, 861–3 (1986).
28. Buratti, L. *et al.* Sex-associated differences in the modulation of vascular risk in patients with asymptomatic carotid stenosis. *J. Cereb. Blood Flow Metab.* **35**, 684–8 (2015).
29. den Hartog, A. G. *et al.* Asymptomatic Carotid Artery Stenosis and the Risk of Ischemic Stroke According to Subtype in Patients With Clinical Manifest Arterial Disease. *Stroke* **44**, 1002–1007 (2013).
30. Divya, K. P., Sandeep, N., Sarma, S. & Sylaja, P. N. Risk of Stroke and Cardiac Events in Medically Treated Asymptomatic Carotid Stenosis. *J. Stroke Cerebrovasc. Dis.* **24**, 2149–2153 (2015).
31. Dua, A. *et al.* Asymptomatic 50% to 75% internal carotid artery stenosis in 288 patients: risk factors for disease progression and ipsilateral neurological symptoms. *Perspect. Vasc. Surg. Endovasc. Ther.* **24**, 165–70 (2012).
32. Durward, Q., Ferguson, G. & Barr, H. The natural history of asymptomatic carotid bifurcation plaques. *Stroke* (1982).
33. Ford, C. S., Frye, J. L., Toole, J. F. & Lefkowitz, D. Asymptomatic carotid bruit and stenosis. A prospective follow-up study. *Arch. Neurol.* **43**, 219–22 (1986).
34. Furu, E. *et al.* Abstract 162: Ipsilateral Ischemic Stroke in Japanese Patients With Asymptomatic Carotid Stenosis on Recent Medical Treatment. *Stroke* **45**, (2014).
35. Grønholdt, M. L., Nordestgaard, B. G., Schroeder, T. V, Vorstrup, S. & Silleesen, H. Ultrasonic echolucent carotid plaques predict future strokes. *Circulation* **104**, 68–73 (2001).
36. Gur, A. Y., Bova, I. & Bornstein, N. M. Is Impaired Cerebral Vasomotor Reactivity a Predictive Factor of Stroke in Asymptomatic Patients? *Stroke* **27**, (1996).
37. Hatsukami, T. S., Healy, D. A., Primozich, J. F., Bergelin, R. O. & Strandness, D. E. Fate of the carotid artery contralateral to endarterectomy. *J. Vasc. Surg.* **11**, 244-50–1 (1990).

38. Johnson, J. M., Kennelly, M. M., Decesare, D., Morgan, S. & Sparrow, A. Natural history of asymptomatic carotid plaque. *Arch. Surg.* **120**, 1010–2 (1985).
39. Kirkpatrick, A. C., Tafur, A. J., Vincent, A. S., Dale, G. L. & Prodan, C. I. Coated-Platelets Improve Prediction of Stroke and Transient Ischemic Attack in Asymptomatic Internal Carotid Artery Stenosis. *Stroke* **45**, 2995–3001 (2014).
40. Mansour, M. A. *et al.* Outcome of moderate carotid artery stenosis in patients who are asymptomatic. *J. Vasc. Surg.* **29**, 217–25–7 (1999).
41. Mansour, M. A. *et al.* The natural history of moderate (50% to 79%) internal carotid artery stenosis in symptomatic, nonhemispheric, and asymptomatic patients. *J. Vasc. Surg.* **21**, 346–56–7 (1995).
42. Markus, H. & Cullinane, M. Severely impaired cerebrovascular reactivity predicts stroke and TIA risk in patients with carotid artery stenosis and occlusion. *Brain* **124**, 457–67 (2001).
43. Mono, M.-L. *et al.* Plaque characteristics of asymptomatic carotid stenosis and risk of stroke. *Cerebrovasc. Dis.* **34**, 343–50 (2012).
44. Nicolaidis, A. N. *et al.* Severity of asymptomatic carotid stenosis and risk of ipsilateral hemispheric ischaemic events: results from the ACSRS study. *Eur. J. Vasc. Endovasc. Surg.* **30**, 275–84 (2005).
45. Olin, J. W. *et al.* The natural history of asymptomatic moderate internal carotid artery stenosis by duplex ultrasound. *Vasc. Med.* **3**, 101–108 (1998).
46. Park, Y.-J., Kim, D.-I., Kim, G.-M., Kim, D.-K. & Kim, Y. Natural History of Asymptomatic Moderate Carotid Artery Stenosis in the Era of Medical Therapy. *World Neurosurg.* **91**, 247–253 (2016).
47. Rockman, C. B. *et al.* Natural history and management of the asymptomatic, moderately stenotic internal carotid artery. *J. Vasc. Surg.* **25**, 423–431 (1997).
48. Roederer, G. O. *et al.* The natural history of carotid arterial disease in asymptomatic patients with cervical bruits. *Stroke* **15**, 605–13 (1984).
49. Satiani, B., Porter, R. M., Biggers, K. M. & Das, B. M. Natural History of Nonoperated, Significant Carotid Stenosis. *Ann. Vasc. Surg.* **2**, 271–278 (1988).
50. Sato, K. *et al.* Low Stroke Rate of Carotid Stenosis Under the Guideline-Oriented Medical Treatment Compared With Surgical Treatment. *Int. Heart J.* **57**, 80–86 (2016).
51. Shanik, G. D., Moore, D. J., Leahy, A., Grouden, M. C. & Colgan, M.-P. Asymptomatic carotid stenosis: A benign lesion? *Eur. J. Vasc. Surg.* **6**, 10–15 (1992).
52. Siebler, M. *et al.* Cerebral microembolism and the risk of ischemia in asymptomatic high-grade internal carotid artery stenosis. *Stroke* **26**, 2184–6 (1995).
53. Silvestrini, M. *et al.* Impaired cerebral vasoreactivity and risk of stroke in patients with asymptomatic carotid artery stenosis. *JAMA* **283**, 2122–7 (2000).
54. Singh, N. *et al.* Moderate carotid artery stenosis: MR imaging-depicted intraplaque hemorrhage predicts risk of cerebrovascular ischemic events in asymptomatic men. *Radiology* **252**, 502–8 (2009).
55. Spence, J. D. *et al.* Effects of Intensive Medical Therapy on Microemboli and Cardiovascular Risk in Asymptomatic Carotid Stenosis. *Arch. Neurol.* **67**, 180 (2010).
56. Takaya, N. *et al.* Association Between Carotid Plaque Characteristics and Subsequent Ischemic Cerebrovascular Events: A Prospective Assessment With MRI--Initial Results. *Stroke* **37**, 818–823 (2006).
57. Tong, Y. & Royle, J. Outcome of patients with symptomless carotid bruits: a prospective study. *Cardiovasc. Surg.* **4**, 174–80 (1996).
58. Zhang, C. *et al.* Microembolic signals and carotid plaque characteristics in patients with asymptomatic carotid stenosis. *Scand. Cardiovasc. J.* **43**, 345–51 (2009).

**Supplementary Table 1:** Characteristics of studies describing prognosis in non-operated asymptomatic carotid stenosis

| STUDY                    | START RECRUIT | FINISH RECRUIT | MEDIAN RECRUIT | PUBLICATION | MEAN AGE | NUMBER OF PATIENTS | IPSILATERAL STROKE RATE | STENOSIS | STATIN (%) | TYPE OF COHORT | REGION      | REASON FOR RECRUITMENT                                                                 |
|--------------------------|---------------|----------------|----------------|-------------|----------|--------------------|-------------------------|----------|------------|----------------|-------------|----------------------------------------------------------------------------------------|
| <b>DURWARD</b>           | 1971          | 1981           | 1976           | 1982        | 62       | 67                 | 0.8                     | 50-99%   | 0          | retrospective  | Canada      | contralateral CEA                                                                      |
| <b>FORD</b>              | 1976          | 1983           | 1980           | 1986        | 60       | 36                 | 0.7                     | 50-99%   | 0          | prospective    | USA         | carotid bruit                                                                          |
| <b>ROEDERER</b>          | 1980          | 1982           | 1981           | 1984        | 63.6     | 101                | 1                       | 50-99%   | 0          | prospective    | USA         | carotid bruit                                                                          |
| <b>BOGOUSSLAVSKY</b>     | 1980          | 1984           | 1982           | 1986        | 60       | 38                 | 1.7                     | 90-99%   | 0          | prospective    | Switzerland | carotid bruit                                                                          |
| <b>AUTRET</b>            | 1981          | 1982           | 1982           | 1987        | 69       | 113                | 1.8                     | 50-99%   | 0          | prospective    | France      | cardiovascular                                                                         |
| <b>JOHNSON</b>           | 1981          | 1984           | 1983           | 1985        | NG       | 121                | 3.3                     | 50-99%   | 0          | prospective    | USA         | carotid bruit, nonspecific symptoms, routine physical examination                      |
| <b>SATIANI</b>           | 1979          | 1986           | 1983           | 1988        | NG       | 103                | 2.43                    | 50-99%   | 0          | retrospective  | USA         | carotid bruit                                                                          |
| <b>HATSUKAMI</b>         | NG            | NG             | 1983           | 1990        | 65       | 74                 | 0                       | 50-99%   | NG         | retrospective  | USA         | contralateral CEA                                                                      |
| <b>SHANIK</b>            | 1981          | 1984           | 1983           | 1992        | 69       | 92                 | 2.2                     | 50-99%   | 0          | prospective    | Ireland     | cardiovascular                                                                         |
| <b>NORRIS</b>            | 1982          | 1986           | 1984           | 1991        | 66.6     | 177                | 2.5                     | 50-99%   | 0          | prospective    | Canada      | asymptomatic cervical bruit                                                            |
| <b>ECST</b>              | 1981          | 1991           | 1986           | 1995        | 64       | 127                | 2.3                     | 50-99%   | 0          | trial          | Europe      | contralateral TIA or stroke                                                            |
| <b>HOBSON VA TRIAL</b>   | 1983          | 1991           | 1987           | 1993        | 64.7     | 233                | 2.4                     | 50-99%   | 0          | trial          | USA         | cardiovascular                                                                         |
| <b>BOCK</b>              | 1985          | 1991           | 1987           | 1993        | 68.1     | 74                 | 3.8                     | 50-99%   | 0          | prospective    | Australia   | carotid bruit                                                                          |
| <b>TONG</b>              | 1980          | 1993           | 1987           | 1996        | 65       | 142                | 0.86                    | 60-99%   | 0          | prospective    | Australia   | carotid bruit                                                                          |
| <b>ACAS</b>              | 1988          | 1993           | 1990           | 1995        | 66       | 834                | 2.3                     | 60-99%   | 0          | trial          | USA         | carotid bruits, evaluation for peripheral vascular surgery, contralateral CEA          |
| <b>MANSOUR</b>           | 1987          | 1993           | 1990           | 1995        | 68.6     | 142                | 1.3                     | 50-79%   | 0          | retrospective  | USA         | Carotid bruit, preoperative work-up for cardio thoracic surgery, contralateral CEA     |
| <b>SEIBLER</b>           | NG            | NG             | 1991           | 1995        | 65.5     | 64                 | 3.4                     | 70-90%   | 0          | prospective    | Germany     | cardiovascular                                                                         |
| <b>MACKEY (ACBS)</b>     | 1988          | 1994           | 1991           | 1997        | 65       | 330                | 1.3                     | 50-99%   | 0          | prospective    | Canada      | carotid bruit                                                                          |
| <b>ROCKMAN</b>           | 1990          | 1992           | 1991           | 1997        | 74.5     | 425                | 1.2                     | 50-79%   | 0          | retrospective  | USA         | bruit, contralateral TIA/stroke,                                                       |
| <b>LONGSTRETH (CHS)</b>  | 1989          | 1992           | 1991           | 1998        | 73       | 185                | 1                       | 70-99%   | 5.6        | prospective    | USA         | general population screening (aged >65)                                                |
| <b>OLIN</b>              | 1989          | 1994           | 1992           | 1998        | 69       | 465                | 0.7                     | 60-79%   | NG         | retrospective  | USA         | bruit, contralateral CEA, contralateral TIA/stroke, cardiothoracic peroperative workup |
| <b>INZITARI (NASCET)</b> | 1988          | 1997           | 1992           | 2000        | 66       | 216                | 3.2                     | 50-99%   | 0          | trial          | USA         | contralateral TIA or stroke                                                            |
| <b>MANSOUR</b>           | 1992          | 1996           | 1994           | 1999        | 70.6     | 344                | 1.9                     | 50-79%   | NG         | prospective    | USA         | carotid bruits, cardiothoracic peroperative workup                                     |
| <b>GUR</b>               | 1995          | 1995           | 1995           | 1996        | 69       | 44                 | 2.2                     | 70-99%   | 0          | prospective    | Isreal      | NG                                                                                     |

|                           |      |      |      |      |      |      |     |        |      |               |               |                                                                                                |
|---------------------------|------|------|------|------|------|------|-----|--------|------|---------------|---------------|------------------------------------------------------------------------------------------------|
| <b>GRONHOLDT</b>          | 1994 | 1996 | 1995 | 2001 | 64   | 111  | 3.5 | 50-99% | 0    | prospective   | Denmark       | carotid bruit, nonhemispheric symptoms such as dizziness and vertigo, contralateral TIA/stroke |
| <b>ABURAHMA</b>           | 1991 | 2000 | 1995 | 2003 | 68   | 101  | 1.5 | 50-99% | NG   | prospective   | USA           | contralateral CEA                                                                              |
| <b>SILVERSTRINI</b>       | 1996 | 1998 | 1997 | 2000 | 71.1 | 94   | 5.4 | 50-99% | 32   | prospective   | Italy         | cardiovascular                                                                                 |
| <b>MARKUS</b>             | NG   | NG   | 1997 | 2001 | NG   | 59   | 1   | 70-99% | NG   | prospective   | UK            | cardiovascular                                                                                 |
| <b>HALLIDAY (ACST)</b>    | 1993 | 2003 | 1998 | 2004 | 68   | 1560 | 1.2 | 60-99% | 38   | trial         | Europe        | cardiovascular                                                                                 |
| <b>ABBOTT (ASED)</b>      | 1996 | 2000 | 1998 | 2005 | 74   | 202  | 1.2 | 60-99% | 75   | prospective   | Australia     | carotid bruit, extracerebral vascular disease, or cerebrovascular symptoms                     |
| <b>DICK</b>               | 1997 | 2002 | 2000 | 2005 | 73   | 525  | 2.1 | 70-99% | 62   | prospective   | Austria       | cardiovascular                                                                                 |
| <b>NICOLAIDES (ACRS)</b>  | 1998 | 2002 | 2000 | 2005 | 70   | 805  | 1.4 | 50-99% | 25   | prospective   | UK            | cardiovascular                                                                                 |
| <b>BALLOTTA</b>           | 1995 | 2004 | 2000 | 2007 | 71   | 98   | 0.7 | 50-99% | NG   | prospective   | Italy         | contralateral CEA                                                                              |
| <b>DURHAM</b>             | 1998 | 2001 | 2000 | 2012 | 69   | 366  | 1.5 | 50-79% | 63   | retrospective | USA           | carotid bruit, vertebrobasilar symptoms, hypertension, preoperative workup, screening programs |
| <b>TAKAYA</b>             | 2000 | 2004 | 2002 | 2006 | 71.1 | 154  | 1.2 | 50-79% | 64   | prospective   | USA           | cardiovascular                                                                                 |
| <b>SABETI</b>             | 2002 | 2003 | 2002 | 2007 | 71.8 | 376  | 2.3 | 50-99% | 59   | prospective   | Austria       | cardiovascular                                                                                 |
| <b>MARKUS (ACES)</b>      | 1999 | 2007 | 2003 | 2010 | 71.5 | 467  | 0.7 | 70-99% | 65   | prospective   | International | cardiovascular                                                                                 |
| <b>SPENCE</b>             | 2000 | 2007 | 2004 | 2010 | 70   | 468  | 0.6 | 60-99% | 44.1 | prospective   | Canada        | carotid bruit                                                                                  |
| <b>DEN HARTOG (SMART)</b> | 1996 | 2012 | 2004 | 2013 | 65.2 | 293  | 0.3 | 50-99% | 60   | prospective   | Netherlands   | cardiovascular                                                                                 |
| <b>SINGH</b>              | 2003 | 2006 | 2005 | 2009 | 92   | 75   | 1.3 | 50-70% | 72   | retrospective | Canada        | cardiovascular                                                                                 |
| <b>SILVESTRINI</b>        | 2004 | 2006 | 2005 | 2010 | 75   | 162  | 2.8 | 50-99% | 49   | prospective   | Italy         | cardiovascular                                                                                 |
| <b>CONRAD</b>             | 2005 | 2006 | 2005 | 2013 | 72.5 | 794  | 1.3 | 50-69% | 87.1 | retrospective | USA           | cardiovascular                                                                                 |
| <b>ZHANG</b>              | NG   | NG   | 2006 | 2009 | 65.5 | 62   | 1.6 | 50-99% | NG   | prospective   | China         | cardiovascular                                                                                 |
| <b>BURATTI</b>            | 2003 | 2009 | 2006 | 2015 | 72.5 | 1109 | 1.8 | 50-99% | 44   | prospective   | Italy         | cardiovascular                                                                                 |
| <b>PARK</b>               | 2003 | 2008 | 2006 | 2016 | 67.7 | 124  | 0.6 | 50-69% | 89   | retrospective | South Korea   | cardiovascular                                                                                 |
| <b>DUA</b>                | 2008 | 2008 | 2008 | 2012 | 75   | 288  | 1   | 50-75% | 63   | retrospective | USA           | cardiovascular                                                                                 |
| <b>MONO</b>               | 2007 | 2009 | 2008 | 2012 | 68.7 | 60   | 2.6 | 50-99% | 82   | prospective   | Switzerland   | cardiovascular                                                                                 |
| <b>HICKS</b>              | 2005 | 2012 | 2008 | 2015 | 70.5 | 258  | 0.9 | 50-99% | 75   | retrospective | USA           | cardiovascular                                                                                 |
| <b>DIVYA</b>              | 2005 | 2013 | 2009 | 2015 | 63.4 | 75   | 0   | 50-99% | 97   | prospective   | India         | contralateral TIA or stroke                                                                    |
| <b>BALLOTTA</b>           | 2005 | 2012 | 2009 | 2015 | 84.9 | 54   | 1.3 | 60-99% | 81.5 | retrospective | Italy         | patients denied CEA                                                                            |
| <b>SATO</b>               | 2006 | 2013 | 2010 | 2016 | 77.5 | 67   | 0   | 50-99% | 70   | retrospective | Japan         | cardiovascular                                                                                 |
| <b>OXVASC</b>             | 2002 | 2017 | 2010 | 2021 | 77.5 | 207  | 0.7 | 50-99% | 89   | prospective   | UK            | contralateral TIA or stroke                                                                    |
| <b>FURUI</b>              | 2009 | 2013 | 2011 | 2014 | 76   | 105  | 0.7 | 50-99% | NG   | prospective   | Japan         | NG                                                                                             |
| <b>KIRKPATRICK</b>        | 2010 | 2013 | 2012 | 2014 | 66.1 | 118  | 2.7 | 50-99% | 74   | prospective   | USA           | cardiovascular                                                                                 |

N G: not given

**Supplementary figure 3.** Ratio of ipsilateral stroke risk in medically treated patients with asymptomatic carotid stenosis by degree of stenosis in all studies published since 1980 stratified by the nature of the study design - observational cohort studies versus the medical treatment group of randomised trials

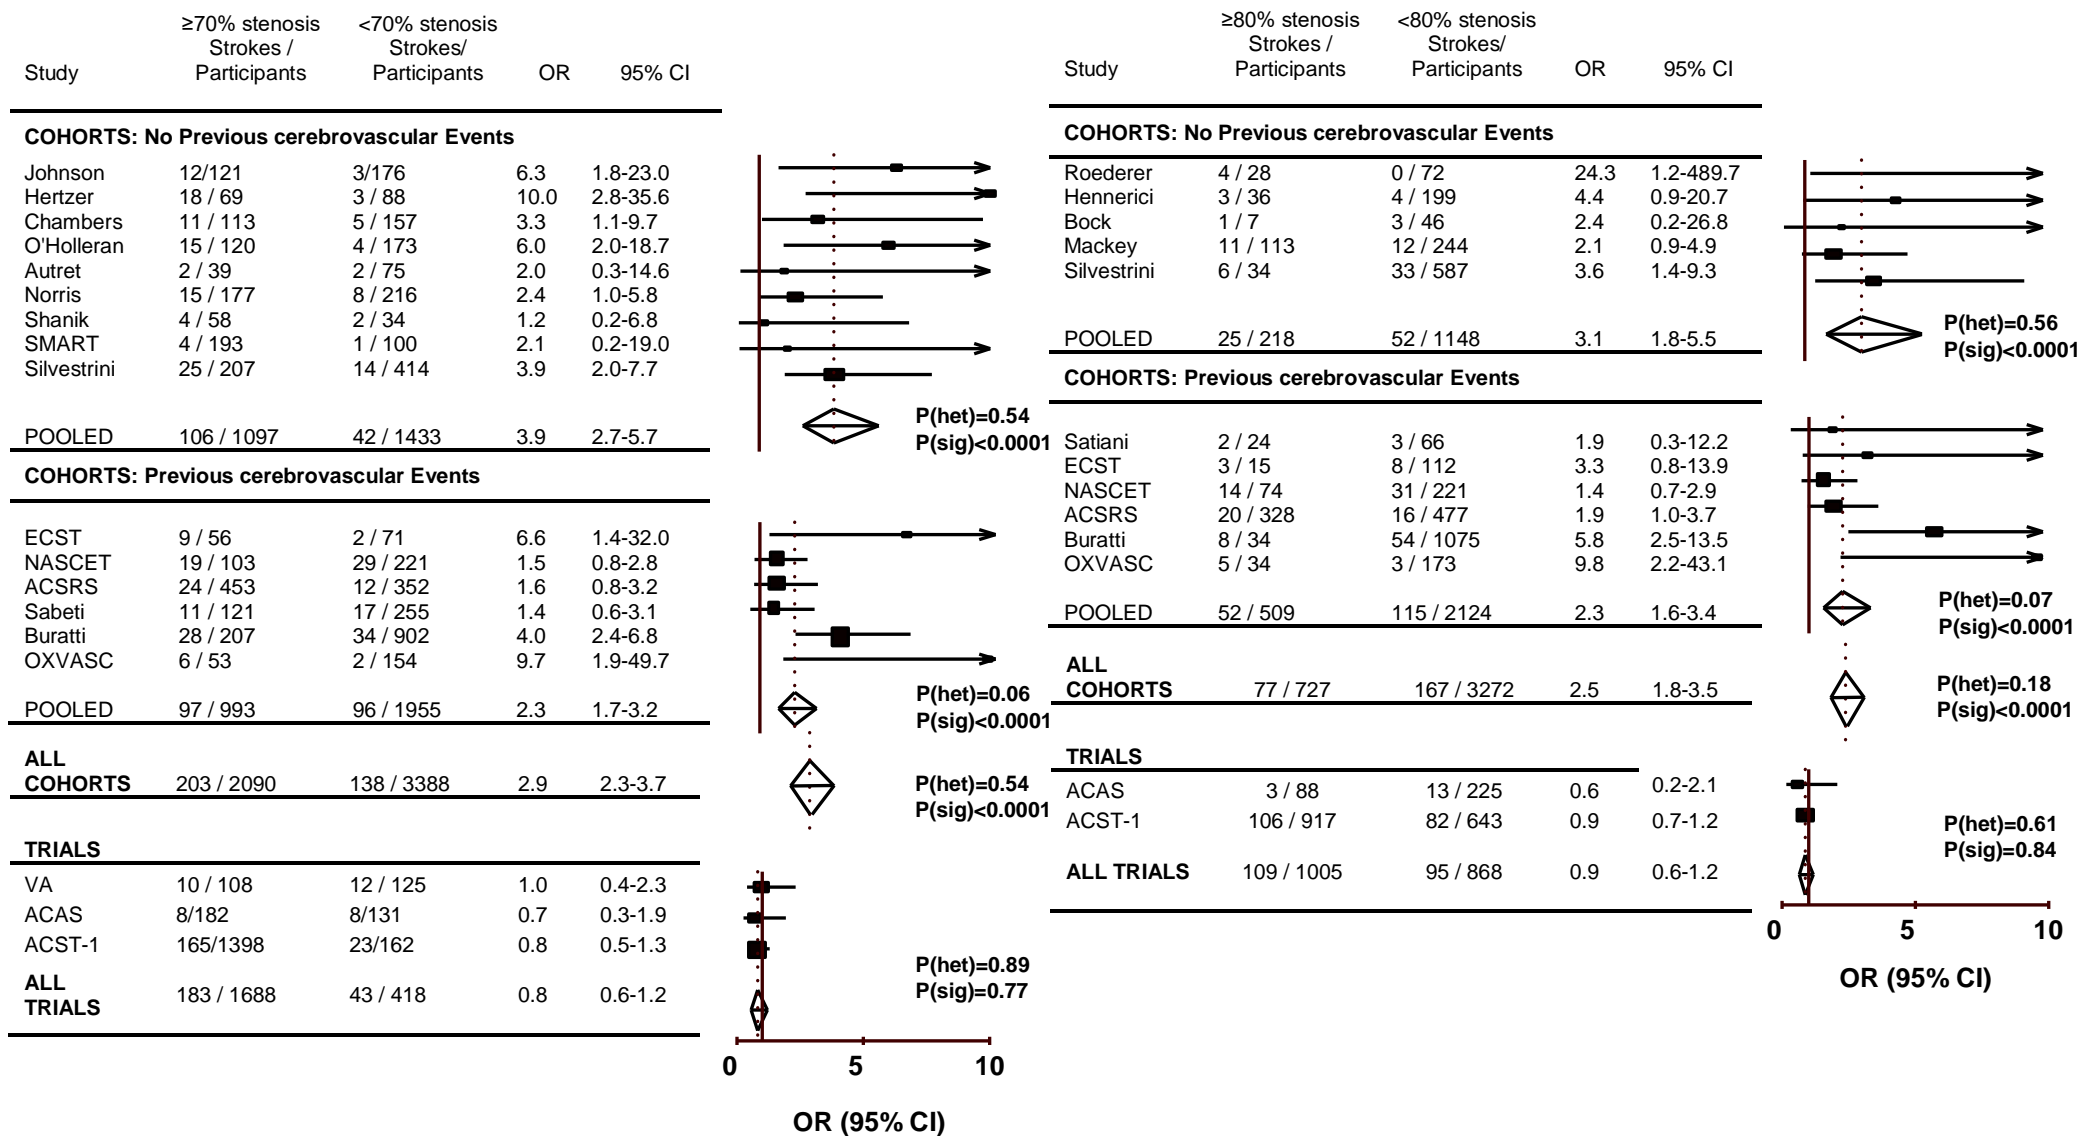



**Supplementary Figure 4.** Risk of ipsilateral stroke in medically treated patients with asymptomatic carotid stenosis by degree of stenosis in all studies since 1985 stratified by year of study publication – pre-2000 versus post-2000

| Study                          | YR   | Severe stenosis<br>Strokes /<br>Participants | Moderate stenosis<br>Strokes/<br>Participants | OR         | 95% CI         | P <sub>SIG</sub>  | P <sub>HETERO</sub> |
|--------------------------------|------|----------------------------------------------|-----------------------------------------------|------------|----------------|-------------------|---------------------|
| <b>Cohort Studies Pre-2000</b> |      |                                              |                                               |            |                |                   |                     |
| Roederer                       | 1984 | 4 / 28                                       | 0 / 72                                        | 24.3       | 1.2-489.7      |                   |                     |
| Johnson                        | 1985 | 12/121                                       | 3/176                                         | 6.3        | 1.8-23.0       |                   |                     |
| Chambers                       | 1986 | 11 / 113                                     | 5 / 157                                       | 3.3        | 1.1-9.7        |                   |                     |
| Hennerici                      | 1987 | 3 / 36                                       | 4 / 199                                       | 4.4        | 0.9-20.7       |                   |                     |
| O'Holleran                     | 1987 | 15 / 120                                     | 4 / 173                                       | 6.0        | 2.0-18.7       |                   |                     |
| Autret                         | 1987 | 2 / 39                                       | 2 / 75                                        | 2.0        | 0.3-14.6       |                   |                     |
| Satiani                        | 1988 | 2 / 24                                       | 3 / 66                                        | 1.9        | 0.3-12.2       |                   |                     |
| Norris                         | 1991 | 15 / 177                                     | 8 / 216                                       | 2.4        | 1.0-5.8        |                   |                     |
| Shanik                         | 1992 | 4 / 58                                       | 2 / 34                                        | 1.2        | 0.2-6.8        |                   |                     |
| Bock                           | 1993 | 1 / 7                                        | 3 / 46                                        | 2.4        | 0.2-26.8       |                   |                     |
| ECST                           | 1995 | 9 / 56                                       | 2 / 71                                        | 6.6        | 1.4-32.0       |                   |                     |
| Mackey                         | 1997 | 11 / 113                                     | 12 / 244                                      | 2.1        | 0.9-4.9        |                   |                     |
| <b>POOLED</b>                  |      | <b>89 / 892</b>                              | <b>48 / 1529</b>                              | <b>3.4</b> | <b>2.3-4.9</b> | <b>&lt;0.0001</b> | <b>0.69</b>         |

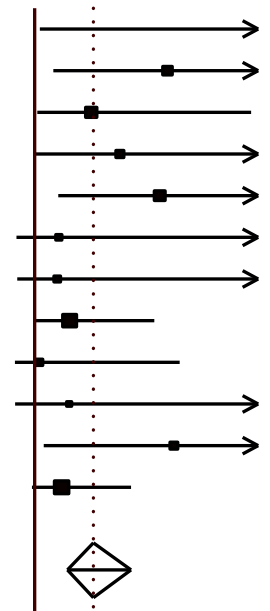

| Study                           | YR   | Severe stenosis<br>Strokes /<br>Participants | Moderate stenosis<br>Strokes/<br>Participants | OR         | 95% CI         | P <sub>SIG</sub>  | P <sub>HETERO</sub> |
|---------------------------------|------|----------------------------------------------|-----------------------------------------------|------------|----------------|-------------------|---------------------|
| <b>Cohort Studies Post-2000</b> |      |                                              |                                               |            |                |                   |                     |
| NASCET                          | 2000 | 19 / 103                                     | 29 / 221                                      | 1.5        | 0.8-2.8        |                   |                     |
| ACSRS                           | 2005 | 24 / 453                                     | 12 / 352                                      | 1.6        | 0.8-3.2        |                   |                     |
| Sabeti                          | 2007 | 11 / 121                                     | 17 / 255                                      | 1.4        | 0.6-3.1        |                   |                     |
| SMART                           | 2013 | 4 / 193                                      | 1 / 100                                       | 2.1        | 0.2-19.0       |                   |                     |
| Silvestrini                     | 2013 | 25 / 207                                     | 14 / 414                                      | 3.9        | 2.0-7.7        |                   |                     |
| Buratti                         | 2015 | 28 / 207                                     | 34 / 902                                      | 4          | 2.4-6.8        |                   |                     |
| OXVASC                          | 2021 | 6 / 53                                       | 2 / 154                                       | 9.7        | 1.9-49.7       |                   |                     |
| <b>POOLED</b>                   |      | <b>117 / 1337</b>                            | <b>109 / 2398</b>                             | <b>2.4</b> | <b>1.8-3.2</b> | <b>&lt;0.0001</b> | <b>0.05</b>         |

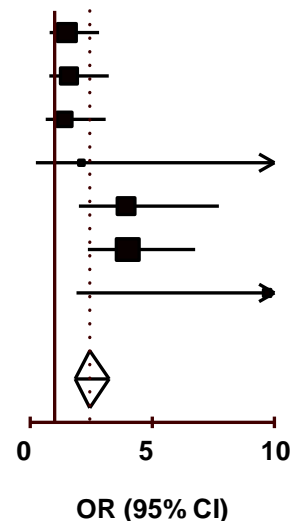

|                            | All cohort studies | Pre-2000 studies | Post-2000 Studies |
|----------------------------|--------------------|------------------|-------------------|
| OR, P <sub>SIG</sub>       | 2.7, <0.0001       | 3.4, <0.0001     | 2.4, <0.0001      |
| P <sub>HETEROGENEITY</sub> | 0.20               | 0.69             | 0.05              |

**Supplementary Figure 5.** Risk of ipsilateral stroke in medically treated patients with asymptomatic carotid stenosis by degree of stenosis in all studies since 1985 stratified by statin usage— <50% of cohort on treatment versus  $\geq$ 50% on treatment

| Study                         | Severe stenosis<br>Strokes /<br>Participants | Moderate stenosis<br>Strokes/<br>Participants | OR   | 95% CI    | P <sub>SIG</sub> | P <sub>HETERO</sub> |
|-------------------------------|----------------------------------------------|-----------------------------------------------|------|-----------|------------------|---------------------|
| <b>&lt;50% Statin Therapy</b> |                                              |                                               |      |           |                  |                     |
| Roederer                      | 4 / 28                                       | 0 / 72                                        | 24.3 | 1.2-489.7 |                  |                     |
| Johnson                       | 12/121                                       | 3/176                                         | 6.3  | 1.8-23.0  |                  |                     |
| Chambers                      | 11 / 113                                     | 5 / 157                                       | 3.3  | 1.1-9.7   |                  |                     |
| Hennerici                     | 3 / 36                                       | 4 / 199                                       | 4.4  | 0.9-20.7  |                  |                     |
| O'Holleran                    | 15 / 120                                     | 4 / 173                                       | 6.0  | 2.0-18.7  |                  |                     |
| Autret                        | 2 / 39                                       | 2 / 75                                        | 2.0  | 0.3-14.6  |                  |                     |
| Satiani                       | 2 / 24                                       | 3 / 66                                        | 1.9  | 0.3-12.2  |                  |                     |
| Norris                        | 15 / 177                                     | 8 / 216                                       | 2.4  | 1.0-5.8   |                  |                     |
| Shanik                        | 4 / 58                                       | 2 / 34                                        | 1.2  | 0.2-6.8   |                  |                     |
| Bock                          | 1 / 7                                        | 3 / 46                                        | 2.4  | 0.2-26.8  |                  |                     |
| ECST                          | 9 / 56                                       | 2 / 71                                        | 6.6  | 1.4-32.0  |                  |                     |
| Mackey                        | 11 / 113                                     | 12 / 244                                      | 2.1  | 0.9-4.9   |                  |                     |
| NASCET                        | 19 / 103                                     | 29 / 221                                      | 1.5  | 0.8-2.8   |                  |                     |
| ACSRS                         | 24 / 453                                     | 12 / 352                                      | 1.6  | 0.8-3.2   |                  |                     |
| Silvestrini                   | 25 / 207                                     | 14 / 414                                      | 3.9  | 2.0-7.7   |                  |                     |
| Buratti                       | 28 / 207                                     | 34 / 902                                      | 4.0  | 2.4-6.8   |                  |                     |
| POOLED                        | 185 / 1862                                   | 137 / 3418                                    | 2.9  | 2.3-3.6   | <0.0001          | 0.28                |

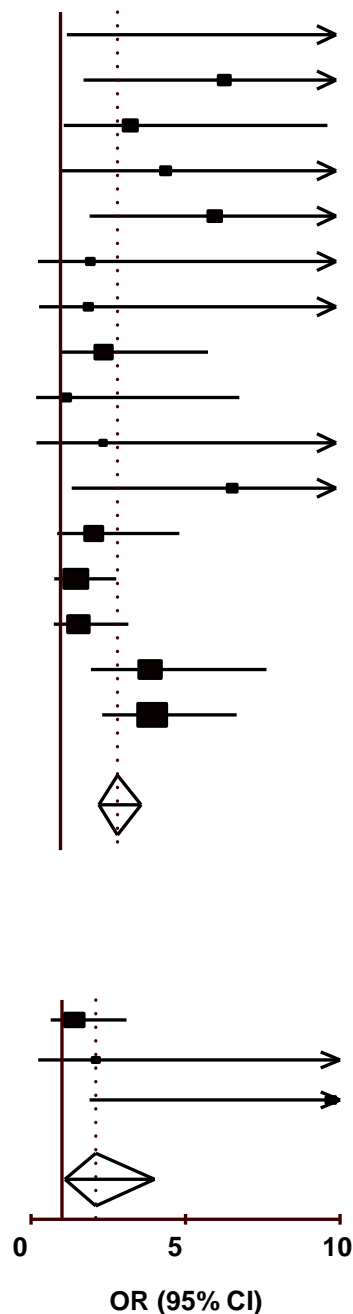

**Supplementary Figure 6.** Risk of ipsilateral stroke in medically treated patients with asymptomatic carotid stenosis by degree of stenosis in all studies since 1985 stratified by grading of study quality – high versus low-to-medium

| Study                              | YR   | Severe stenosis<br>Strokes /<br>Participants | Moderate stenosis<br>Strokes/<br>Participants | OR         | 95% CI         | P <sub>SIG</sub>  | P <sub>HETERO</sub> |
|------------------------------------|------|----------------------------------------------|-----------------------------------------------|------------|----------------|-------------------|---------------------|
| <b>Cohort Studies High Quality</b> |      |                                              |                                               |            |                |                   |                     |
| Roederer                           | 1984 | 4 / 28                                       | 0 / 72                                        | 24.3       | 1.2-489.7      |                   |                     |
| Johnson                            | 1985 | 12/121                                       | 3/176                                         | 6.3        | 1.8-23.0       |                   |                     |
| Chambers                           | 1986 | 11 / 113                                     | 5 / 157                                       | 3.3        | 1.1-9.7        |                   |                     |
| Hennerici                          | 1987 | 3 / 36                                       | 4 / 199                                       | 4.4        | 0.9-20.7       |                   |                     |
| O'Holleran                         | 1987 | 15 / 120                                     | 4 / 173                                       | 6.0        | 2.0-18.7       |                   |                     |
| Autret                             | 1987 | 2 / 39                                       | 2 / 75                                        | 2.0        | 0.3-14.6       |                   |                     |
| Satiani                            | 1988 | 2 / 24                                       | 3 / 66                                        | 1.9        | 0.3-12.2       |                   |                     |
| Norris                             | 1991 | 15 / 177                                     | 8 / 216                                       | 2.4        | 1.0-5.8        |                   |                     |
| Mackey                             | 1997 | 11 / 113                                     | 12 / 244                                      | 2.1        | 0.9-4.9        |                   |                     |
| Sabeti                             | 2007 | 11 / 121                                     | 17 / 255                                      | 1.4        | 0.6-3.1        |                   |                     |
| Silvestrini                        | 2013 | 25 / 207                                     | 14 / 414                                      | 3.9        | 2.0-7.7        |                   |                     |
| Buratti                            | 2015 | 28 / 207                                     | 34 / 902                                      | 4          | 2.4-6.8        |                   |                     |
| OXVASC                             | 2021 | 6 / 53                                       | 2 / 154                                       | 9.7        | 1.9-49.7       |                   |                     |
| <b>POOLED</b>                      |      | <b>145 / 1359</b>                            | <b>108 / 3103</b>                             | <b>3.3</b> | <b>2.6-4.4</b> | <b>&lt;0.0001</b> | <b>0.36</b>         |

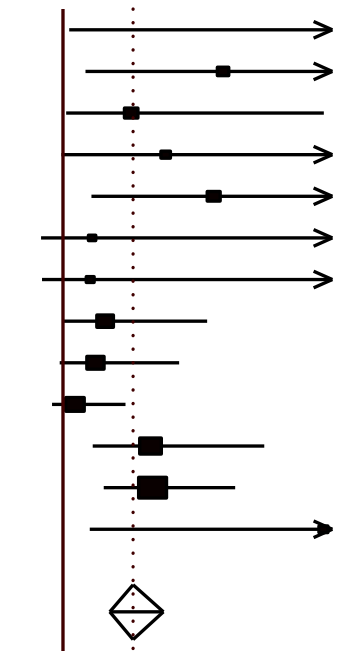

| Study                                       | YR   | Severe stenosis<br>Strokes /<br>Participants | Moderate stenosis<br>Strokes/<br>Participants | OR         | 95% CI         | P <sub>SIG</sub>  | P <sub>HETERO</sub> |
|---------------------------------------------|------|----------------------------------------------|-----------------------------------------------|------------|----------------|-------------------|---------------------|
| <b>Cohort Studies Low-to-Medium Quality</b> |      |                                              |                                               |            |                |                   |                     |
| Hertzer                                     | 1985 | 18/69                                        | 3/88                                          | 10.0       | 2.8-35.6       |                   |                     |
| Shanik                                      | 1992 | 4 / 58                                       | 2 / 34                                        | 1.2        | 0.2-6.8        |                   |                     |
| Bock                                        | 1993 | 1 / 7                                        | 3 / 46                                        | 2.4        | 0.2-26.8       |                   |                     |
| ECST                                        | 1995 | 9 / 56                                       | 2 / 71                                        | 6.6        | 1.4-32.0       |                   |                     |
| NASCET                                      | 2000 | 19 / 103                                     | 29 / 221                                      | 1.5        | 0.8-2.8        |                   |                     |
| ACSRS                                       | 2005 | 24 / 453                                     | 12 / 352                                      | 1.6        | 0.8-3.2        |                   |                     |
| SMART                                       | 2013 | 4 / 193                                      | 1 / 100                                       | 2.1        | 0.2-19.0       |                   |                     |
| <b>POOLED</b>                               |      | <b>79 / 939</b>                              | <b>52 / 912</b>                               | <b>2.2</b> | <b>1.5-3.3</b> | <b>&lt;0.0001</b> | <b>0.12</b>         |

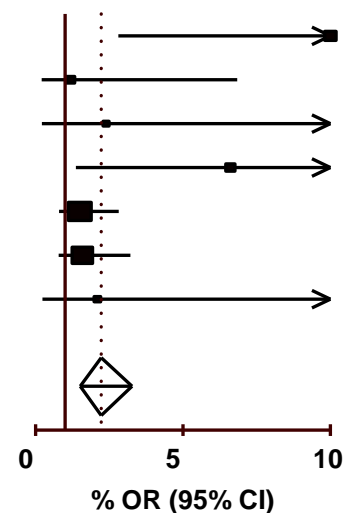

|                            | All cohort studies | High quality | Low-Medium quality |
|----------------------------|--------------------|--------------|--------------------|
| OR, P <sub>SIG</sub>       | 2.7, <0.0001       | 3.3, <0.0001 | 1.8, 0.0069        |
| P <sub>HETEROGENEITY</sub> | 0.20               | 0.36         | 0.65               |

Study quality graded based on STROBE criteria and key criteria required for meta-analysis, including the following items: study objectives stated clearly; patient selection criteria stated clearly; patients enrolled consecutively without predetermined selection; interventions adequately described; outcome definitions provided; rate of dropout or crossover to endarterectomy or stenting of <20%, and outcome ascertainment by a neurologist

**Supplementary Figure 7.** Annual rate of ipsilateral stroke in medically treated patients with asymptomatic carotid stenosis by degree of stenosis in all studies published since 1980 stratified by the nature of the study design - observational cohort studies versus the medical treatment group of randomised trials

Cohorts (30) refers to all cohort studies reporting risk for 50-69% or 70-99% stenosis;  
Cohorts (15) refers to all cohort studies reporting risk in *both* 50-69% and 70-99% stenosis

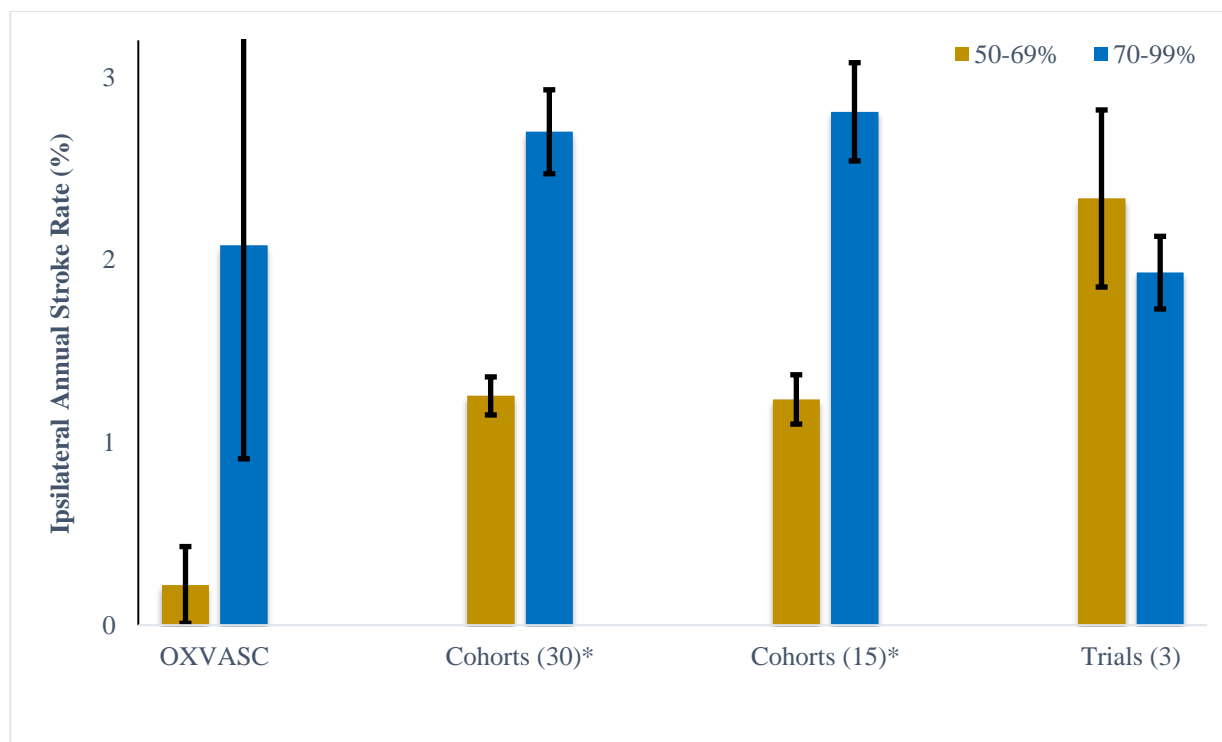

\*OXVASC data excluded

**Supplementary Figure 8.**

**A** Meta-regression bubble plot of log odd ratio of stroke risk for severe versus moderate carotid stenosis by proportion of cohort with severe stenosis (%) stratified by the nature of the study design - observational cohort studies (blue) versus the medical treatment arm of randomised trials (red) (n=20)

**B** Time-trend in the proportion of patients with severe asymptomatic stenosis in non-selective cohort studies reporting risk in *both* 50-69% and 70-99% stenosis (n=15) recruiting after 1980

**C** Trend in stratified ipsilateral stroke risk by proportion of patients with severe stenosis included in non-selective cohort studies (n=15) after 1980

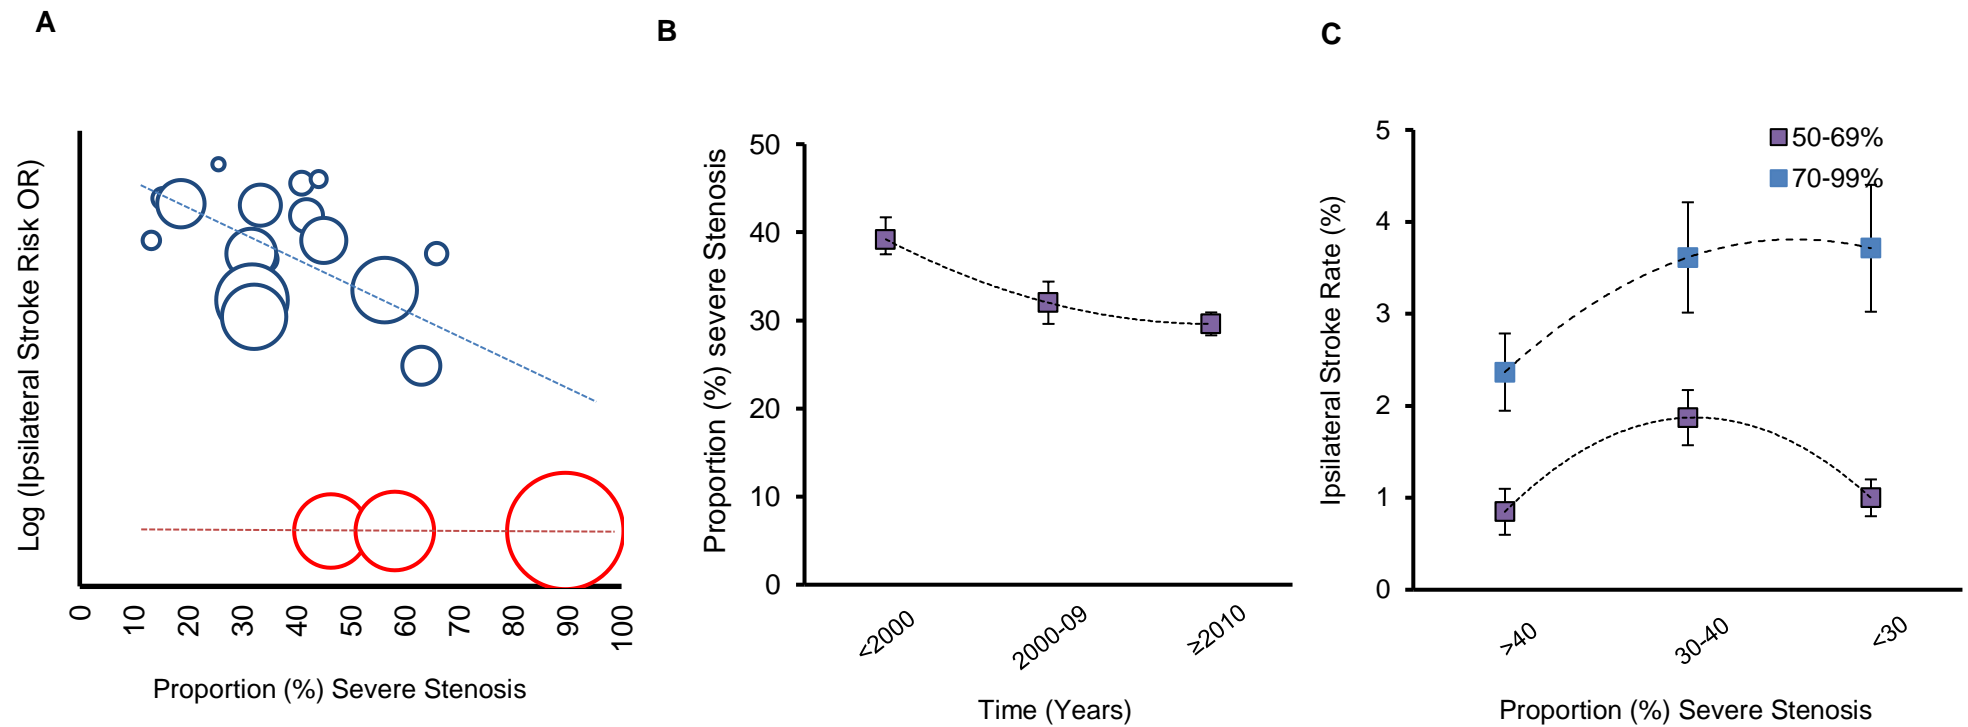

**Supplementary Figure 9.** Egger Funnel Plot for assessment of potential publication bias, including all cohort studies published since 1980, reporting ipsilateral stroke risk in medically treated patients with asymptomatic carotid stenosis by degree of stenosis

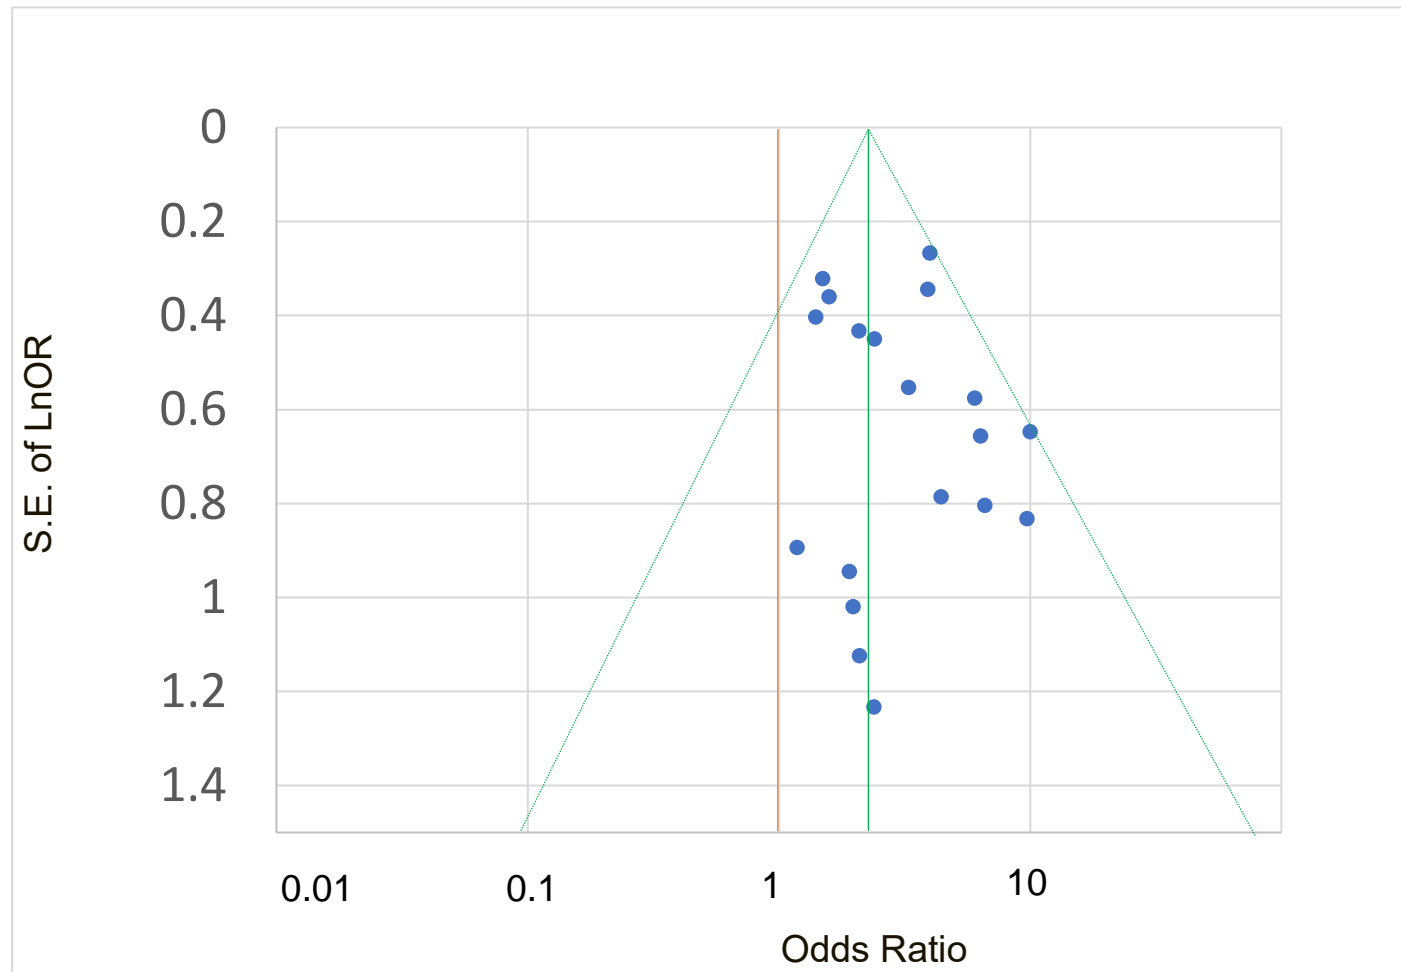

Supplement: mmc1.pdf [file mmc1.pdf]
